# Supplementary material for: Crystal Structure of the Isocitrate Dehydrogenase 2 from Acinetobacter baumannii (AbIDH2) Reveals a Novel Dimeric Structure with Two Monomeric-IDH-Like Subunits
Source: MDPI journal article supplement (doi:10.3390/ijms19041131), 2018-04-10
Supplement: s1 [file s1]

## Figure legends

Fig. S1. The sequence alignment of the dimeric AbIDH2 with its homologous IDHs from *Azoarcus tolulyticus* (AtIDH, GenBank Accession WP\_076602605.1) and *Acidovorax ebreus* (AeIDH, GenBank Accession WP\_015913126.1) and two typical monomeric NADP-IDHs from *Azotobacter vinelandii* (AvIDH, GenBank Accession No. BAA11169.1) and *Corynebacterium glutamicum* (CgIDH, GenBank Accession No. WP\_011013800.1). The residue numbering in the figure is based on AbIDH2 sequence. The conserved residues are shaded by black. The residues that involved in NADP<sup>+</sup> binding are marked by red pentagram ★.

Fig. S2. The sequence alignment of the dimeric AbIDH2 with its homologous IDHs from *Azoarcus tolulyticus* (AtIDH, GenBank Accession WP\_076602605.1) and *Acidovorax ebreus* (AeIDH, GenBank Accession WP\_015913126.1) and two typical monomeric NADP-IDHs from *Azotobacter vinelandii* (AvIDH, GenBank Accession No. BAA11169.1) and *Corynebacterium glutamicum* (CgIDH, GenBank Accession No. WP\_011013800.1). The residue numbering in the figure is based on AbIDH2 sequence. The conserved residues are shaded by black. The residues that involved in substrate binding are marked by red triangle ▲.

Fig. S3. (A), Overall AbIDH2 monomer structure is resolved into domain I and domain II. There are 12  $\alpha$ -helices and 7  $\beta$ -strands in domain I, and 18  $\alpha$ -helices and 20  $\beta$ -strands in domain II. (B), Superimposition of apo-AtIDH2 (purple) and apo-CgIDH (green, 2b0t) secondary structures. (C), Superimposition of apo-AtIDH2 (purple) and AvIDH-isocitrate (yellow, 1jtw) secondary structures. (D), Superimposition of apo-AtIDH2 (purple) and AvIDH-NADP<sup>+</sup> (cyan, 1j1w) secondary structures.
